1     **TITLE:** Antimicrobial efficacy of neem and liquorice with chlorhexidine on Streptococcus  
2     sanguis, Streptococcus mutans, Lactobacillus and Actinomyces naeslundii – An In Vitro  
3     Study

4     **Running title:** Efficacy of neem and liquorice

5     **Author:**

6             Saad M Alqahtani,

7             Chairman,

8             Department of Periodontics and Community Dental Sciences,

9             College of Dentistry, King Khalid University,

10            Abha-61471, Saudi Arabia.

11            E-mail: s.malqahtani123@gmail.com

12            <https://orcid.org/0000-0003-4724-4021>

13

14

15

16

17

18

19

20

21

22

23

24 **Abstract:**

25 The study was to formulate 2% neem and 2% liquorice mouthwashes and to compare the  
26 antimicrobial efficacy of these mouthwashes with the standard 0.2% chlorhexidine  
27 mouthwash. Alcoholic solution was prepared and added to neem mixture and liquorice  
28 mixture separately and made up to a volume of 16000 ml with purified water. Nine dilutions  
29 of each drug were done with Brain heart infusion broth (BHI) for MIC. Culture suspension  
30 was added in each serially diluted tube of 200 µl. The tubes were incubated for 24 hours and  
31 observed for turbidity. Minimum inhibitory concentration (MIC) of 2% neem, 2% liquorice  
32 and 0.2% chlorhexidine against *Lactobacillus*, *Actinomyces naeslundii*, *Streptococcus*  
33 *sanguis*, *Streptococcus mutans* is determined by serial dilution analysis. *Streptococcus*  
34 *mutans* shows sensitivity to all three mouthwashes at a concentration starting from 0.2 µg/ml.  
35 *Lactobacillus* shows sensitivity to neem and chlorhexidine mouthwashes at a concentration  
36 starting from 1.6 µg/ml, whereas liquorice is effective at a concentration starting from 3.125  
37 µg/ml. *Streptococcus sanguis* shows sensitivity to chlorhexidine and liquorice mouthwashes  
38 at a concentration starting from 25 µg/ml, whereas it shows sensitivity to neem at a  
39 concentration starting from 50 µg/ml. *Actinomyces naeslundii* shows sensitivity to  
40 chlorhexidine and neem mouthwashes at a concentration starting from 1.6 µg/ml, whereas it  
41 shows sensitivity to liquorice at a concentration starting from 3.125µg/ml. Analysis showed  
42 an inhibition of all the four strains by the mouthwashes. The MIC for the studied  
43 mouthwashes was found to be similar to that of 0.2% chlorhexidine.

44

45 **Keywords:** Antimicrobial, chlorhexidine, liquorice, neem, streptococcus

46

47

## 48 INTRODUCTION

49 Plaque is an organized mass, consisting mainly of microorganisms, that adheres to teeth,  
50 prostheses, and oral surfaces and is found in the gingival crevice and periodontal pockets. It  
51 also comprises of an organic compound consisting of bacterial by-products such as enzymes,  
52 materia alba, desquamated cells, and inorganic components such as calcium and phosphate  
53 [1]. Gingivitis, which has a direct association with dental plaque [2], affects the oral health of  
54 70%–100% of the population across the world [3-5]. Plaque-induced gingivitis is an  
55 inflammatory response of the gingival tissues resulting from bacterial plaque accumulation  
56 located at and below the gingival margin [6]. It does not result in clinical attachment loss or  
57 directly cause tooth loss [7]. It is the most common form of gingival disease. Patients may  
58 notice symptoms that include bleeding with tooth brushing, blood in saliva, gingival swelling  
59 and redness, and halitosis in the case of established forms [8]. Experimental studies done on  
60 plaque induced gingivitis have shown the first empiric evidence that accumulation of  
61 microbial biofilm on clean tooth surfaces reproducibly induces an inflammatory response in  
62 the associated gingival tissues and removal of plaque leads to disappearance of the clinical  
63 signs of inflammation [9]. Plaque control is the regular removal of microbial plaque and the  
64 prevention of its accumulation on the teeth and adjacent gingival surfaces. The utilization of  
65 antimicrobial mouth rinses has been considered a useful adjunct to mechanical plaque control  
66 [10]. Tooth brushing is the most popular self-performed oral hygiene method to  
67 mechanically remove dental plaque. However, this mechanical approach by most individuals  
68 is often not sufficiently effective [11]. Chlorhexidine (0.2%) is considered the gold standard  
69 chemical plaque control agent because of its clinical efficacy. It is one of the most  
70 investigated compounds in dentistry and has been proven to inhibit plaque regrowth and the  
71 development of gingivitis by the first definitive experimental study [12].

72 Herbal medicines, derived from botanical sources, have been applied in dentistry for a long  
73 history to inhibit microorganisms, reduce inflammation, soothe irritation, and relieve pain  
74 [13]. Literature reports that a considerable number of herbal mouthwashes have achieved  
75 encouraging results in plaque and gingivitis control. When compared with antimicrobial  
76 activity of synthetic commercial mouthwashes, herbal mouthwashes can exhibit additional  
77 anti-inflammatory and antioxidant properties, which could further improve periodontal health  
78 [14]. Neem leaf and its constituents have been identified to exhibit immunomodulatory,  
79 antiinflammatory, antihyperglycaemic, antiulcer, antimalarial, antifungal, antibacterial,  
80 antiviral, antioxidant, antimutagenic and anticarcinogenic properties. The antibacterial effect  
81 of neem mouthwash against salivary levels of Streptococcus mutans and Lactobacillus has  
82 been demonstrated [15]. Liquorice extracts and its principal component, glycyrrhizin exhibits  
83 useful properties such as anti- inflammatory, antiviral, antimicrobial, antioxidative, anticancer,  
84 immunomodulatory, hepatoprotective and cardioprotective effects [16]. Licorice mouthwash  
85 has shown its effectiveness in reducing plaque accumulation and gingival inflammation along  
86 with no discoloration of teeth or unpleasant taste [17].

87 The present study was undertaken to formulate 2% neem and 2% liquorice mouthwashes and  
88 seeks to compare the antimicrobial efficacy of these mouthwashes with the standard 0.2%  
89 chlorhexidine mouthwash.

## 90 **MATERIALS AND METHODS**

91 The neem leaf extract and liquorice extract were obtained from Amsar Private Limited,  
92 Bardez, Goa, India, and the preparation of mouthwash was done at AVN Arogya Ayurvedic  
93 Hospital, Madurai, India. (Fig.1)

94

95 All the materials were dispensed as per the list using suitable balances. Neem extract was  
96 dissolved in water separately. Sodium benzoate and benzoic acid were dissolved in alcohol  
97 (96%). Saccharin sodium, sorbitol and glycerin were dissolved in water and then transferred  
98 to the alcoholic solution. The above alcoholic solution was added to the neem mixture and  
99 made up to a volume of 16000 ml with purified water (Fig.2) to the filtered solution (Fig.3),  
100 peppermint oil was added and stirred.

101 All the materials were dispensed as per the list using suitable balances. Liquorice extract was  
102 dissolved in water separately. Sodium benzoate, citric acid, saccharin sodium, sorbitol and  
103 glycerin were dissolved in water and then transferred to the alcoholic solution. The above  
104 alcoholic solution was added to the liquorice mixture and made up to a volume of 16000 ml  
105 with purified water. To the filtered solution, peppermint oil was added and stirred.  
106 Commercially available 0.2% chlorhexidine (Hexifresh mouthwash) was used. Both the  
107 prepared mouthwashes were stored in seaparate dark opaque bottles. (Fig.4)

108 Minimum inhibitory concentration (MIC) of 2% neem, 2% liquorice and 0.2% chlorhexidine  
109 against *Lactobacillus*, *Actinomyces naeslundii*, *Streptococcus sanguis*, *Streptococcus mutans*  
110 is determined by serial dilution analysis.

111 MIC procedure:

112 Nine dilutions of each drug were done with Brain heart infusion broth (BHI) for MIC (Fig.5)  
113 In the initial tube 20  $\mu$ l of drug was added into 380microliter of BHI broth. For further  
114 dilutions 200 $\mu$ l amount of BHI broth was dispensed into the next 9 tubes separately. Then  
115 from the initial tube 200  $\mu$ l was transferred to the first tube containing 200  $\mu$ l of BHI broth.  
116 This was considered as  $10^{-1}$  dilution. From  $10^{-1}$  diluted tube 200  $\mu$ l was transferred to second  
117 tube to make  $10^{-2}$  dilution. The serial dilution (Fig.6) was repeated up to  $10^{-9}$  dilution for  
118 each drug. Out of the stock cultures that were maintained, 5  $\mu$ l was taken and added into 2 ml

119 of BHI (brain heart infusion) broth. Above culture suspension was added in each serially  
120 diluted tube of 200 µl. The tubes were incubated for 24 hours and observed for turbidity.

## 121 **RESULTS**

122 In the present study, we formulated 2% neem, 2% liquorice and a commercially available  
123 0.2% chlorhexidine mouthwash. An in vitro analysis of the antibacterial efficacy of the  
124 mouthwashes was performed, followed by an in vivo analysis of the clinical efficacy in 90  
125 subjects randomized into three groups. During the study, five participants did not complete  
126 the study and were excluded from the analysis (2 from neem, 2 from liquorice and 1 from  
127 chlorhexidine mouthwash groups). Table 1 shows the in vitro analysis of the antimicrobial  
128 sensitivity test of *Streptococcus mutans*, *Streptococcus sanguis*, *Actinomyces naeslundii* and  
129 *Lactobacillus* to neem, liquorice and chlorhexidine mouthwashes by serial dilution analysis.

130 *Streptococcus mutans* shows sensitivity to all three mouthwashes at a concentration starting  
131 from 0.2 µg/ml. *Lactobacillus* shows sensitivity to neem and chlorhexidine mouthwashes at a  
132 concentration starting from 1.6 µg/ml, whereas liquorice is effective at a concentration starting  
133 from 3.125 µg/ml. *Streptococcus sanguis* shows sensitivity to chlorhexidine and liquorice  
134 mouthwashes at a concentration starting from 25 µg/ml, whereas it shows sensitivity to neem  
135 at a concentration starting from 50 µg/ml. *Actinomyces naeslundii* shows sensitivity to  
136 chlorhexidine and neem mouthwashes at a concentration starting from 1.6 µg/ml, whereas it  
137 shows sensitivity to liquorice at a concentration starting from 3.125µg/ml.

## 138 **DISCUSSION**

139 The formation of dental plaque, the primary etiological factor for periodontal diseases is  
140 characterized by the initial adherence of limited number of pathogenic bacteria to the salivary  
141 pellicle and progressive accumulation and growth of complex flora. There is a direct

142 relationship between the presence of dental plaque and the development of gingivitis, which  
143 is characterized by the inflammation of gingiva without clinical attachment loss [10]. Plaque  
144 control usually means preventive measures aimed at removing dental plaque and preventing  
145 it from recurring. Complete removal of bacterial plaque from the dento-gingival region is the  
146 most effective method of preventing gingivitis and periodontitis and the effective removal of  
147 dental plaque is important for dental and periodontal health. This can be accomplished  
148 through mechanical and chemical measures [18].

149 Tooth brushing is the most accepted oral hygiene practice. Chemical inhibitors of plaque and  
150 calculus incorporated in mouthwashes or dentifrices also play an important role in plaque  
151 control as adjuncts to mechanical cleansing [18]. The side effects associated with the  
152 commercially available plaque control agents has ushered an era of herbal alternatives. Neem  
153 and Liquorice are traditional herbs widely used in India and South Asia from time  
154 immemorial for maintaining healthy teeth and gingiva.

155 Neem is rich in a vast array of biologically active compounds that are chemically distinct and  
156 structurally multifaceted. Neem twigs are used for brushing and the leaves of neem have been  
157 effectively used in the treatment of gingivitis and periodontitis [19]. Licorice or liquorice  
158 (*Glycyrrhizaglabra*), is a perennial herb which possesses sweet taste and has extensive  
159 pharmacological effects [20]. Being indigenous, cheap and readily available, neem and  
160 liquorice can be definitely expected to have better patient compliance and acceptability. Due  
161 to the aforementioned potential benefits, we aimed at formulating 2% neem and 2% liquorice  
162 mouth rinses. Their efficacy *in vitro* was compared with a commercially available 0.2%  
163 chlorhexidine mouthwash. We assessed the antimicrobial efficacy of neem, liquorice and  
164 chlorhexidine *in vitro* using the serial dilution method with pre-cultured *Streptococcus*  
165 *mutans*, *Streptococcus sanguis*, *Actinomycesnaeshlundii* and *Lactobacillus*, which are non-

166 specific opportunistic pathogens that can induce gingivitis. Neem exhibited potent  
167 antimicrobial effect against *Streptococcus mutans*, *Streptococcus sanguis*,  
168 *Actinomycesnaeslundii* and *Lactobacillus* at a concentration of 0.2, 50, 1.6 and 1.6 µg /ml  
169 respectively.

170 Nayak A *et al* [21] observed inhibition of *E. faecalis*, *S. mutans*, *C.albicans* by alcoholic  
171 neem extract at 1.88%, 7.5% and 3.75% respectively and the aqueous neem extract at 7.5%.

172 Maragathavalli S. *et al* [22] demonstrated inhibition of *Bacillus pumillus*, *Pseudomonas*  
173 *aeruginosa* and *Staphylococcus aureus* by the methanol and ethanol extracts of neem.

174 Widowati *et al* [23] in their study concluded that the neem stick extract had a higher  
175 antibacterial effect on *Streptococcus mutans* than the neem leaf extract. Chloroform extracts

176 of neem were identified to inhibit *Streptococcus mutans*, *Streptococcus salivarius* and  
177 *Fusobacteriumnucleatum* by Packialakshmi *et al* [15] The minimum inhibitory concentration

178 of acetonic extract of neem for *Streptococcus sobrinus* was observed to be 0.05% (w/v) by M

179 Bhuiyan *et al* [24] In a study by Prashant *et al* [25] with neem extract, maximum zone of  
180 inhibition on *Streptococcus mutans* was observed at 50% concentration with minimal effect

181 on *Streptococcus mitis*, *Streptococcus salivarius* and *Streptococcus sanguis*.

182 Our study revealed Liquorice to be a potent inhibitor of *Streptococcus mutans*, *Streptococcus*  
183 *sanguis*, *Actinomycesnaeslundii* and *Lactobacillus* at a concentration of 0.2, 25, 3.125 and  
184 3.125 µg /ml respectively.

185 Earlier studies on the antimicrobial effect of liquorice by Manoj. M. Nitalikar *et al* [26] with  
186 gram positive (*Bacillus subtili* and *Staphylococcus aureus*) and gram negative (*E.coli* and

187 *Pseudomonas aeruginosa*) bacteria and M.H. Shirazi *et al* [27] with *Salmonella typhi*,

188 *Salmonella paratyphiB*, *Shigellasonni*, *Shigellaflexneri* and *Enterotoxigenic .E. coli* and Vivek

189 K. Gupta *et al* [28] with *Antimycobacterium* have proven the inhibitory effect of liquorice on



190 microorganisms. In our study *Streptococcus mutans*, *Streptococcus sanguis*,  
191 *Actinomycesnaeslundii* and *Lactobacillus* were inhibited by chlorhexidine at concentration of  
192 0.2, 25, 1.6 and 1.6 µg /ml respectively. This is in accordance with the antimicrobial efficacy  
193 of chlorhexidine previously reported by W.W. Briner *et al* [29] on *Streptococci* and  
194 *Actinomyces* and W.G Wade *et al* [30] on 355 subgingivalmicro organism isolates. Studies  
195 reported by T.D. Hennesely *et al* [31] on gram positive cocci and Sigrun Eick *et al* [32] on  
196 *Streptococci*, *Enterobacteria*, *Candida albicans*, *Porphyromonasgingivalis*,  
197 *Aggregatibacteractinomycetemcomitans*, and *Fusobacteriumnucleatum* have reported  
198 antimicrobial efficacy of chlorhexidine at a concentration of 0.19 to 2.0µg /ml and 0.01% to  
199 0.50% respectively.

## 200 **CONCLUSION**

- 201 1. Ruminating on the substantial therapeutic benefits of neem and liquorice, we prepared 2%  
202 neem and 2% liquorice mouthwashes and compared with 0.2% chlorhexidine mouthwash.
- 203 2. An in vitro analysis of the formulated mouthwashes, to test the effect on primary  
204 colonizers like *Streptococcus mutans*, *Streptococcus sanguis*, *Lactobacillus* and  
205 *Actinomyces naeslundii* showed an inhibition of all the four strains by themouthwashes.
- 206 3. The MIC for the studied mouthwashes was found to be similar to that of 0.2%  
207 chlorhexidine.

208

209

210

211

212

213

214     **REFERENCES:**

- 215     1. American Academy of Periodontology. Glossary of periodontal terms. 4<sup>th</sup> ed. Chicago:  
216     American Academy of Periodontology; 2001.
- 217     2. O. Shibly, S. Rifai, and J. J. Zambon, “Supragingival dental plaque in the etiology of oral  
218     diseases,” *Periodontology 2000*, 1995; vol. 8, no. 1, pp. 42–59.
- 219     3. R. Rodan, F. Khlaifat, L. Smadi, R. Azab, and A. Abdalmohdi, “Prevalence and severity  
220     of gingivitis in school students aged 6–11 years in Tafelah Governorate, South Jordan:  
221     results of the survey executed by National Woman’s Health Care Center,” *BMC Research*  
222     *Notes*, 2015; vol. 8, no. 1, p. 662.
- 223     4. P. Carvajal, M. Gomez, S. Gomes et al., “Prevalence, severity, and risk indicators of  
224     gingival inflammation in a multi-center study on South American adults: a cross sectional  
225     study,” *Journal of Applied Oral Science*, 2016; vol. 24, no. 5, pp. 524–534.
- 226     5. M. M. Idrees, S. N. Azzeghaiby, M. M. Hammad, and O. B. Kujan, “Prevalence and  
227     severity of plaque-induced gingivitis in a Saudi adult population,” *Saudi Medical Journal*,  
228     2014; vol. 35, no. 11, pp. 1373–1377.
- 229     6. Murakami S, Mealey BL, Mariotti A, Chapple ILC. Dental plaque–induced gingival  
230     conditions. *J Periodontol*. 2018; 89(Suppl 1): S17–S27.
- 231     7. Tonetti MS, Chapple ILC, Jepsen S, Sanz M. Primary and secondary prevention of  
232     periodontal and peri-implant diseases. *J Clin Periodontol*. 2015; 42(Suppl. 16):S1-S4.
- 233     8. Quirynen M, Dadamio J, Van den Velde S, et al. Characteristics of 2000 patients who  
234     visited a halitosis clinic. *J Clin Periodontol*. 2009; 36:970–975.
- 235     9. Harald Loe,Else Theilade, S. Borglum Jensen. Experimental Gingivitis in Man. *J*  
236     *Periodontol*. 1965; 36(3):177-187.
- 237     10. Treatment of plaque-induced gingivitis, chronic periodontitis and other clinical conditions

- 238 (Academy Report). *J Periodontol.* 2001; 72:1790-1800.
- 239 11. G. A. van der Weijden and K. P. Hioe, “A systematic review of the effectiveness of self-  
240 performed mechanical plaque removal in adults with gingivitis using a manual  
241 toothbrush,” *Journal of Clinical Periodontology*, 2005; vol. 32, no. Suppl 6, pp. 214–228.
- 242 12. Loe. H, Schiott C.R. The effect of mouthrinses and topical application of chlorhexidine on  
243 the development of dental plaque and gingivitis in man. *J Periodontal Res.* 1970; 5(2): 79-  
244 83.
- 245 13. J. B. Taheri, S. Azimi, N. Rafeian, and H. A. Zanjani, “Herbs in dentistry,” *International*  
246 *Dental Journal*, 2011; vol. 61, no. 6, pp. 287–296.
- 247 14. Y. Chen, R. W. Wong, C. McGrath, U. Hagg, and C. J. Seneviratne, “Natural compounds  
248 containing mouthrinses in the management of dental plaque and gingivitis: a systematic  
249 review,” *Clinical Oral Investigations*, 2014; vol. 18, no. 1, pp. 1–16.
- 250 15. N. C. J. Packia Lekshmi, N. Sowmia, S.Viveka, J. Raja Brindha, S. Jeeva. The inhibiting  
251 effect of *Azadirachta indica* against dental pathogens. *Asian J. Plant Sci. Res.* 2012; 2 (1):  
252 6-10.
- 253 16. Marjan Nassiri Asl, Hossein Hosseinzadeh. Review of Pharmacological Effects of  
254 *Glycyrrhiza* sp. and its Bioactive Compounds. *Phytother Res.* 2008; 22:709–724.
- 255 17. Jain P, Sontakke P, Walia S, Yadav P, Biswas G, Kaur D. Assessment of the efficacy of  
256 licorice versus 0.2% chlorhexidine oral rinse on plaque-induced gingivitis: A randomized  
257 clinical trial. *Indian J Oral Health Res* 2017;3:15-8.
- 258 18. John M.Moran.Chemical plaque control-prevention for the masses. *Periodontol* 2000.  
259 1997; 15; 109-117.
- 260 19. Kausik Biswas, Ishita Chattopadhyay, Ranajit K. Banerjee, UdayBandyopadhyay.  
261 Biological activities and medicinal properties of neem (*Azadirachta indica*).*Current*

- 262 Science. 2002; 82(11): 1336-1345.
- 263 20. Vijay Singh Jatav, Santosh K Singh, Pankaj Khatri, Ashish K Sharma. Recent  
264 Pharmacological Trends of Glycyrrhiza glabra Linn. IJPFR. 2011; 1(1): 170-185.
- 265 21. Nayak Aarati, Nayak Ranganath N, G. Soumya, B. Bhat Kishore, KudalkarMithun.  
266 Evaluation of antibacterial and anticandidial efficacy of aqueous and alcoholic extract of  
267 Neem (Azadirachta indica) An in vitro study. IJRAP. 2011; 2 (1): 230-235.
- 268 22. Maragathavalli.S, Brindha. S, Kaviyarasi N.S, B. Annadurai, Gangwar S.K. Antimicrobial  
269 activity in leaf extract of neem (Azadirachta indica Linn). I.J.S.N. 2012; 3(1):110-113.
- 270 23. Widowati Siswomihardjo, Siti Sunarintyas Badawi, Masahiro Nishimura, TaizoHamada.  
271 The difference of antibacterial effect of neem leaves and stick extracts. Int Chin J Dent.  
272 2007; 7: 27-29.
- 273 24. M.D.Mohashine Bhuiyan, Michiko Nishimura, Seishi Matsumura, TsutomuShimono.  
274 Antibacterial effects of the crude Azadirachta indica, neem bark extracts of Streptococcus  
275 sobrinus. Pediatric Dental Journal. 1997; 7(1): 61-64.
- 276 25. Prashant GM, Chandu GN, Murulikrishna KS, Shafi ulla MD. The effect of mango and  
277 neem extract on four organisms causing dental caries: Streptococcus mutans,  
278 Streptococcus salivavius, Streptococcus mitis, and Streptococcus sanguis: An in vitro  
279 study. Indian J Dent Res. 2007; 18(4):148-51.
- 280 26. Manoj M. Nitalika, Kailas C. Munde, Balaji V. Dhore, Sajid N. Shikalgar. Studies of  
281 antibacterial activities of Glycyrrhiza glabra root extract. Int J Pharmtech Res. 2010; 2(1):  
282 899-901.
- 283 27. M.H.Shirazi, R.Ranjbar, S.Eshraghi, G.Sadeghi, N.Jonaidi, N.Bazzaz. An evaluation of  
284 antibacterial activity of Glycyrrhiza glabra extract on the growth of Salmonella, Shigella  
285 and ETEC E.coli. J Biol sci. 2007; 7(5):827-829.

- 286 28. Vivek K Gupta, Atiya Fatima, UzmaFaridi, Arvind S. Negi, Karuna Shanker, Kumar J.K,  
287 Neha Rahuja, Suaib Luqman, Brijesh S. Sisodia, Dharmendra Saikia, DarokarM. Suman  
288 P.S, Khanuja. Antimicrobial potential of Glycyrrhiza glabra roots. Journal of  
289 Ethnopharmacology. 2008; 116: 377–380.
- 290 29. W. W. Briner, F. Grossman, R. Y. Buckner, G. F. Rebitski, T. F. Sox, R. F. Setser, M.  
291 L.Ebert. Assessment of susceptibility of plaque bacteria to Chlorhexidine after six months  
292 oral use. J Periodontal Res. 1986; Suppl:53-59.
- 293 30. W. G. Wade, M. Addy. In vitro Activity of a Chlorhexidine containing mouthwash against  
294 Subgingival bacteria. J Periodontol. 1989; 60:521-525.
- 295 31. T.D.Hennessey. Some antibacterial properties of Chlorhexidine.JPeriodontalRes.1973; 8  
296 (12):61-67.
- 297 32. Sigrun Eick, Susann Goltz, Sandor Nietzsche, Holger Jentsch, Wolfgang Pfister. Efficacy  
298 of chlorhexidine digluconate–containing formulations and other mouthrinses against  
299 periodontopathogenic microorganisms. Quintessence Int. 2011; 42:687–700.

300 **FIGURES:**

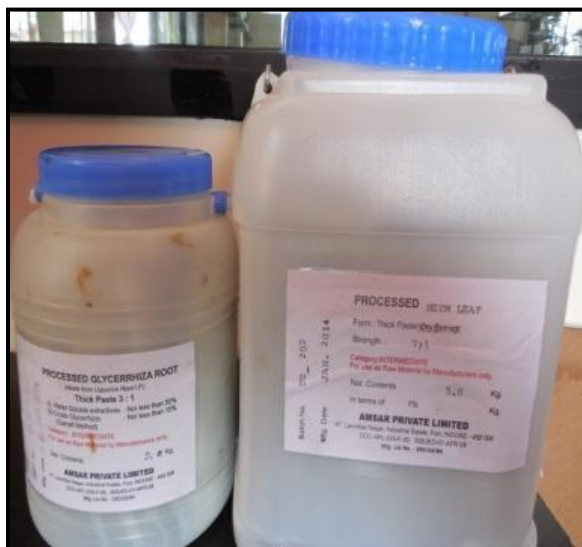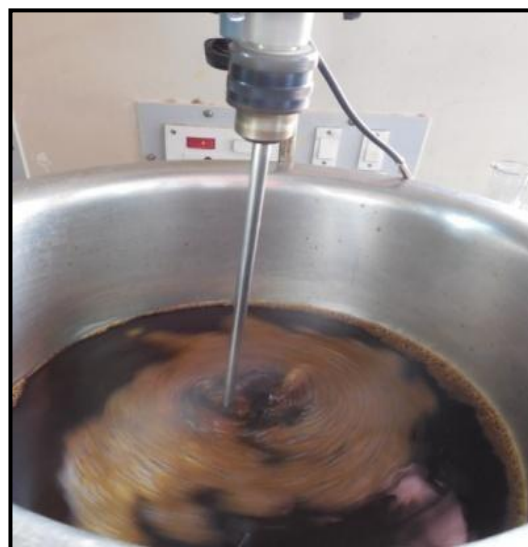

301

**Fig. 1: Neem and Liquorice extracts**

**Fig. 2: Mixing of ingredients with stirrer**

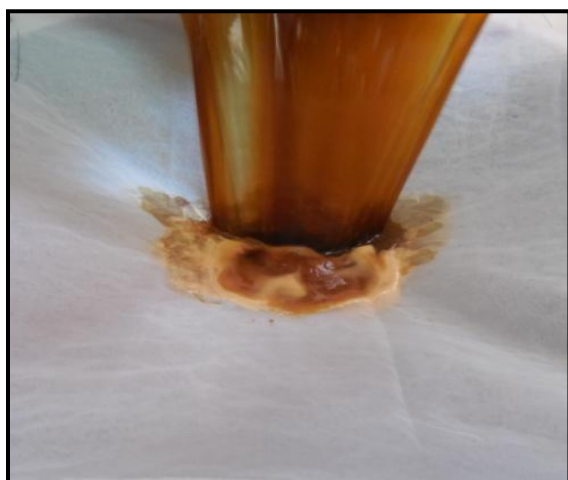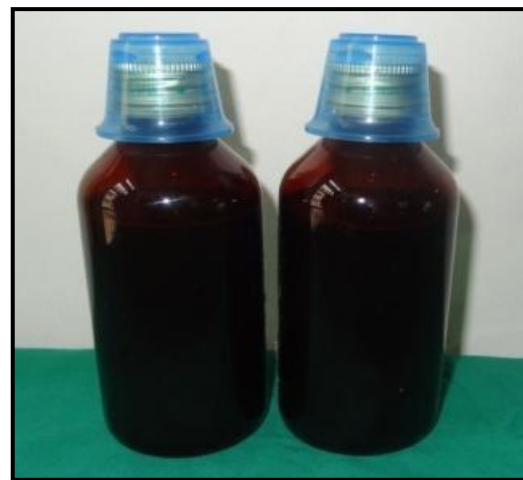

302

**Fig. 3: Filtering the prepared mouthwash**

303

**Fig. 4: Neem and liquorice mouthwashes in opaque bottles**

304

305

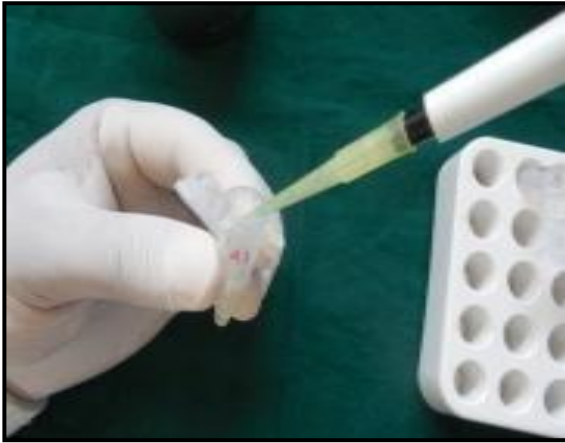

306

**Fig. 5: Dispensing BHI broth into tubes**

307

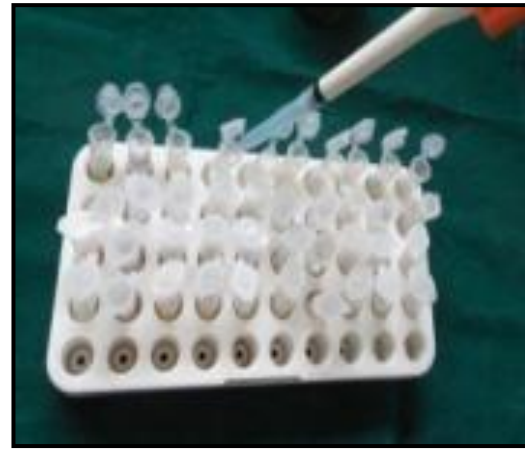

**Fig. 6: Serial dilution of the drug**

308

309

310

311

312

313

314

315

316

317

318

319

320

321

322 Table: 1: In vitro analysis:

| Streptococcus mutans   |               |              |             |             |               |               |                |              |              |              |              |
|------------------------|---------------|--------------|-------------|-------------|---------------|---------------|----------------|--------------|--------------|--------------|--------------|
| S.N                    | Mouthwash     | 100<br>µg/ml | 50<br>µg/ml | 25<br>µg/ml | 12.5<br>µg/ml | 6.25<br>µg/ml | 3.125<br>µg/ml | 1.6<br>µg/ml | 0.8<br>µg/ml | 0.4<br>µg/ml | 0.2<br>µg/ml |
| 1.                     | Neem          | S            | S           | S           | S             | S             | S              | S            | S            | S            | S            |
| 2.                     | Liquorice     | S            | S           | S           | S             | S             | S              | S            | S            | S            | S            |
| 3.                     | Chlorhexidine | S            | S           | S           | S             | S             | S              | S            | S            | S            | S            |
| Lactobacillus          |               |              |             |             |               |               |                |              |              |              |              |
| 1.                     | Neem          | S            | S           | S           | S             | S             | S              | S            | R            | R            | R            |
| 2.                     | Liquorice     | S            | S           | S           | S             | S             | S              | R            | R            | R            | R            |
| 3.                     | Chlorhexidine | S            | S           | S           | S             | S             | S              | S            | R            | R            | R            |
| Streptococcus sanguis  |               |              |             |             |               |               |                |              |              |              |              |
| 1.                     | Neem          | S            | S           | R           | R             | R             | R              | R            | R            | R            | R            |
| 2.                     | Liquorice     | S            | S           | S           | R             | R             | R              | R            | R            | R            | R            |
| 3.                     | Chlorhexidine | S            | S           | S           | R             | R             | R              | R            | R            | R            | R            |
| Actinomyces naeslundii |               |              |             |             |               |               |                |              |              |              |              |
| 1.                     | Neem          | S            | S           | S           | S             | S             | S              | S            | R            | R            | R            |
| 2.                     | Liquorice     | S            | S           | S           | S             | S             | S              | R            | R            | R            | R            |
| 3.                     | Chlorhexidine | S            | S           | S           | S             | S             | S              | S            | R            | R            | R            |

323 S-Sensitive; R-Resistant

324
